# Supplementary material for: Tailoring self-assembly behavior of a biological surfactant by imidazolium-based surfactants with different lengths of hydrophobic alkyl tails
Source: Royal Society of Chemistry journal article supplement (doi:10.1039/c5ra21979e), 2015-12-23
Supplement: c5ra21979e1.pdf [file c5ra21979e1.pdf]

## Tailoring Self-assembly Behavior of Biological Surfactant By Imidazolium-based Surfactants with Different Length of Hydrophobic Alkyl Tails

Zhaohua Song , Xia Xin\* , Jinglin Shen, Han Zhang, Shubin Wang, Yanzhao Yang\*

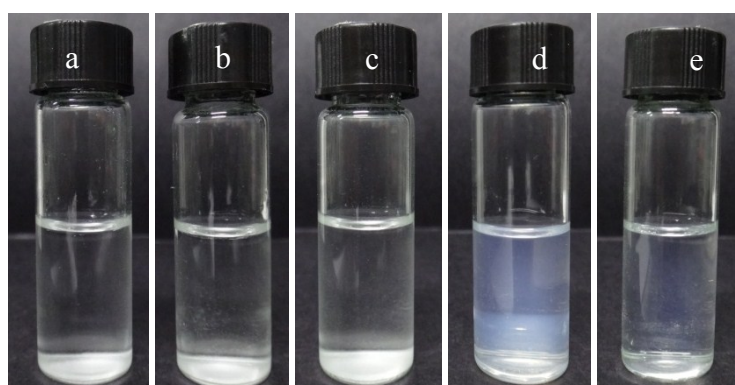

Figure S1 The photographs of typical samples of the phase transition with the addition of  $[C_{14}mim]Br$  to  $50 \text{ mmol L}^{-1}$  NaDC samples without the addition of PBS:  $c_{NaDC} = 50 \text{ mmol L}^{-1}$  and  $c_{[C_{14}mim]Br}$  is changeable: (a) 5, (b) 7.5, (c) 10, (d) 75, (e)  $100 \text{ mmol L}^{-1}$ .  $T = 20.0 \pm 0.1^\circ\text{C}$ .

---

\*Author to whom correspondence should be addressed, E-mail: [xinx@sdu.edu.cn](mailto:xinx@sdu.edu.cn).

Phone: +86-531-88363597. Fax: +86-531-88361008

\*Author to whom correspondence should be addressed, E-mail: [yzhyang@sdu.edu.cn](mailto:yzhyang@sdu.edu.cn).

Phone: +86-531-88362988. Fax: +86-531-88361008

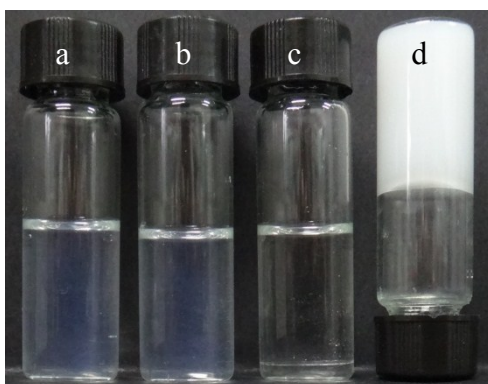

**Figure S2** The photographs of typical samples of  $100 \text{ mmol L}^{-1} \text{ C}_n\text{mimBr}/50 \text{ mmol L}^{-1}\text{NaDC}$  mixed system. (a)  $\text{C}_{14}\text{mimBr}$ ; (b)  $\text{C}_{12}\text{mimBr}$ ; (c)  $\text{C}_8\text{mimBr}$ ; (d)  $\text{C}_2\text{mimBr}$ .
